# Dynamic interaction network inference from longitudinal microbiome data

Jose Lugo-Martinez<sup>☆1</sup>, Daniel Ruiz-Perez<sup>☆2</sup>, Giri Narasimhan<sup>2,\*</sup>, Ziv Bar-Joseph<sup>1,\*</sup>

---

## Abstract

**Background** Several studies have focused on the microbiota living in environmental niches including human body sites. In many of these studies researchers collect longitudinal data with the goal of understanding not just the composition of the microbiome but also the interactions between the different taxa. However, analysis of such data is challenging and very few methods have been developed to reconstruct dynamic models from time series microbiome data.

**Results** Here we present a computational pipeline that enables the integration of data across individuals for the reconstruction of such models. Our pipeline starts by aligning the data collected for all individuals. The aligned profiles are then used to learn a dynamic Bayesian network which represents causal relationships between taxa and clinical variables. Testing our methods on three longitudinal microbiome data sets we show that our pipeline improve upon prior methods developed for this task. We also discuss the biological insights provided by the models which include several known and novel interactions.

**Conclusions** We propose a computational pipeline for analyzing longitudinal microbiome data. Our results provide evidence that microbiome alignments coupled with dynamic Bayesian networks improve predictive performance over previous methods and enhance our ability to infer biological

---

<sup>☆</sup>These authors have contributed equally to this work.

\*Correspondence: Giri Narasimhan, [giri@fiu.edu](mailto:giri@fiu.edu); Ziv Bar-Joseph, [zivbj@cs.cmu.edu](mailto:zivbj@cs.cmu.edu)

<sup>1</sup>Computational Biology Department, School of Computer Science, Carnegie Mellon University, Pittsburgh, Pennsylvania, 15213, USA

<sup>2</sup>Bioinformatics Research Group, Florida International University, Miami, Florida, 33199, USA

relationships within the microbiome and between taxa and clinical factors.

*Keywords:* Dynamic interaction network inference, Longitudinal microbiome analysis, Microbial composition prediction, Dynamic Bayesian networks, Temporal alignment

---

## 1. Introduction

Multiple efforts have attempted to study the microbiota living in environmental niches including human body sites. These microbial communities can play beneficial as well as harmful roles in their hosts and environments. For instance, microbes living in the human gut perform numerous vital functions for homeostasis ranging from harvesting essential nutrients to regulating and maintaining the immune system. Alternatively, a compositional imbalance known as dysbiosis can lead to a wide range of human diseases [1], and is linked to environmental problems such as harmful algal blooms [2].

While many studies profile several different types of microbial taxa, it is not easy in most cases to uncover the complex interactions within the microbiome and between taxa and clinical factors (e.g., gender, age, ethnicity). Microbiomes are inherently dynamic, thus, in order to fully reconstruct these interactions we need to obtain and analyze longitudinal data [3]. Examples include characterizing temporal variation of the gut microbial communities from pre-term infants during the first weeks of life, and understanding responses of the vaginal microbiota to biological events such as menses. Even when such longitudinal data is collected, the ability to extract an accurate set of interactions from the data is still a major challenge.

To address this challenge we need computational time-series tools that can handle data sets that may exhibit missing or noisy data and non-uniform sampling. Furthermore, a critical issue which naturally arises when dealing with longitudinal biological data is that of temporal rate variations. Given longitudinal samples from different individuals (for example, gut microbiome), we cannot expect that the rates in which interactions take place is exactly the same between these individuals. Issues including age, gender, external exposure, etc. may lead to faster or slower rates of change between individuals. Thus, to analyze longitudinal data across individuals we need to first align the microbial data. Using the aligned profiles we can next employ other methods to construct a model for the process being studied.

31 Most current approaches for analyzing longitudinal microbiome data fo-  
32 cus on changes in outcomes over time [4, 5]. The main drawback of this  
33 approach is that individual microbiome entities are treated as independent  
34 outcomes, hence, potential relationships between these entities are ignored.  
35 An alternative approach involves the use dynamical systems such as the  
36 generalized Lotka-Volterra (gLV) models [6, 7, 8, 9]. While gLV and other  
37 dynamical systems can help in studying the stability of temporal bacterial  
38 communities, they are not well-suited for causality and probabilistic infer-  
39 ence over discrete time. Finally, probabilistic graphical models (e.g., hidden  
40 Markov models, Kalman filters and dynamic Bayesian networks) are ma-  
41 chine learning tools which can effectively model dynamic processes, as well  
42 as discover causal interactions [10].

43 In this work we first adapt statistical spline estimation and dynamic time-  
44 warping techniques for aligning time-series microbial data so that they can  
45 be integrated across individuals. We use the aligned data to learn a Dynamic  
46 Bayesian Network (DBN), where nodes represent microbial taxa, clinical con-  
47 ditions, or demographic factors and edges represent causal relationships be-  
48 tween these entities. We evaluate our model by using multiple data sets  
49 comprised of the microbiota living in human body parts including gastroin-  
50 testinal tract, urogenital tract and oral cavity. We show that models for  
51 these systems can accurately predict changes in taxa and that they greatly  
52 improve upon models constructed by prior methods. Finally, we characterize  
53 the biological relationships in the reconstructed microbial communities and  
54 discuss known and novel interactions discovered by these models.

## 55 2. Methods

### 56 *Data sets*

57 We collected multiple public longitudinal microbiome data sets for testing  
58 our method:

59 **Infant gut microbiome** This data set was collected by La Rosa *et*  
60 *al.* [5]. They sequenced gut microbiome from 58 pre-term infants in neonatal  
61 intensive care unit (NICU). The data was collected during the first 12 weeks  
62 of life (until discharged from NICU or deceased) sampled every day or two  
63 on average. Following analysis 29 microbial taxa were reported across the  
64 922 total infant gut microbiome measurements. In addition to the taxa  
65 information, this data set includes clinical and demographic information for  
66 example, gestational age at birth, post-conceptual age when sample was

67 obtained, mode of delivery (C-section or vaginal), antibiotic use (percentage  
68 of days of life on antibiotic), and more (see Additional file 1: Table S1 for  
69 complete list of clinical features available).

70 **Vaginal microbiome** The vaginal microbiota data set was collected by  
71 Gajer *et al.* [4]. They studied 32 reproductive-age healthy women over a  
72 16-week period. This longitudinal data set is comprised of 937 self-collected  
73 vaginal swabs and vaginal smears sampled two times a week. Analysis identi-  
74 fied 330 bacterial taxa in the samples. The data also contains clinical and de-  
75 mographic attributes on the non-pregnant women such as Nugent score [11],  
76 menses duration, tampon usage, vaginal douching, sexual activity, race and  
77 age. To test the alignment methods we further sub-divided the microbial  
78 composition profiles of each subject by menstrual periods. This resulted in  
79 119 time-series samples, an average of 3-4 menstrual cycles per woman. Ad-  
80 ditional file 2: Figure S1a shows four sub-samples derived from an individual  
81 sample over the 16-week period along with corresponding menses informa-  
82 tion.

83 **Oral cavity microbiome** The cavity data was downloaded from the  
84 case-control study conducted by DiGiulio *et al.* [12] comprised of 40 pregnant  
85 women, 11 of whom delivered pre-term. Overall they collected 3,767 samples  
86 and identified a total of 1,420 microbial taxa. Data was collected weekly dur-  
87 ing gestation and monthly after delivery from four body sites: vagina, distal  
88 gut, saliva, and tooth/gum. In addition to bacterial taxonomic composition,  
89 these data sets report clinical and demographic attributes which include ges-  
90 tational status, gestational or postpartum day when sample was collected,  
91 race and ethnicity. In this paper, we solely focus on the tooth/gum samples  
92 during gestation from Caucasian women in the control group to reduce poten-  
93 tial confounding factors. This restricted set contains 374 temporal samples  
94 from 18 pregnant women.

95 Additional file 1: Table S1 summarizes the three longitudinal microbiome  
96 data sets used in this study, including the complete list of clinical features  
97 available.

### 98 *Temporal alignment*

99 As mentioned in the Background, a challenge when comparing time series  
100 obtained from different individuals is the fact that while the overall process  
101 studied in these individuals may be similar, the *rates* of change may differ  
102 based on several factors (age, gender, other diseases, etc.). Thus, prior to  
103 modeling the relationships between the different taxa we first align the data

104 sets between individuals by warping the time scale of each sample into the  
105 scale of another representative sample referred to as *reference*. The goal of an  
106 alignment algorithm is to determine, for each individual  $i$ , a function  $f_i(t)$   
107 which takes as an input a reference time  $t$  and outputs the corresponding  
108 time for individual  $i$ . Using this function we can compare taxa values for  
109 all individuals sampled for the same time point. This approach effectively  
110 sets the stage for accurate discovery of trends and patterns, hence, further  
111 disentangling the dynamic and temporal relationships between entities in the  
112 microbiome.

113 There are several possible options for selecting transformation function  $f_i$ .  
114 Most methods used to date rely on polynomial functions [13, 14]. Prior work  
115 on the analysis of gene expression data indicated that given the relatively  
116 small number of time points for each individual simpler functions tend to  
117 outperform more complicated ones [15]. Therefore, we used a first degree  
118 polynomial:  $f_i(t) = \frac{(t-b)}{a}$  as the alignment function for tackling the temporal  
119 alignment problem, where  $a$  and  $b$  are the parameters of the function.

#### 120 *Data pre-processing*

121 Since alignment relies on continuous (polynomial) functions while the  
122 data is sampled at discrete intervals, the first step is to represent the sample  
123 data using continuous curves as shown by the transition from Fig. 1a to  
124 Fig. 1b. Following prior work [15], we use B-splines for fitting continuous  
125 curves to microbial composition time-series data, thus, enabling principled  
126 estimation of unobserved time points and interpolation at uniform intervals.  
127 To avoid overfitting we removed any sample that had less than nine measured  
128 time points, and estimated a cubic B-spline from the observed abundance  
129 profile for all taxa in remaining samples using *splrep* and *BSpline* from the  
130 Python function *scipy.interpolate*. Additional file 3: Figure S2 shows the  
131 original and cubic spline of a representative microbial taxa from a randomly  
132 selected individual sample across each data set.

#### 133 *Aligning microbial taxon*

134 To discuss the alignment algorithm we first assume that a reference sam-  
135 ple, to which all other samples would be aligned, is available. We next discuss  
136 how to choose such reference.

Formally, let  $s_r^j(t)$  be the spline curve for microbial taxa  $j$  at time  $t \in [t_{min}, t_{max}]$  in the reference time-series sample  $r$ , where  $t_{min}$  and  $t_{max}$  denote the starting and ending time points of  $s_r^j$ , respectively. Similarly, let  $s_i^j(t')$

be the spline for individual  $i$  in the set of samples to be warped for taxa  $j$  at time  $t' \in [t'_{min}, t'_{max}]$ . Next, analogously to Bar-Joseph *et al.* [13], the alignment error for microbial taxa  $j$  between  $s_r^j$  and  $s_i^j$  is defined as

$$e^j(r, i) = \frac{\int_{\alpha}^{\beta} (s_i^j(f_i(t)) - s_r^j(t))^2 dt}{\beta - \alpha},$$

where  $\alpha = \max\{t_{min}, f_i^{-1}(t'_{min})\}$  and  $\beta = \min\{t_{max}, f_i^{-1}(t'_{max})\}$  correspond to the starting and ending time points of the alignment. Observe that by smoothing the curves, it is possible to estimate the values at any intermediate time point in the alignment interval  $[\alpha, \beta]$ . Finally, we define the microbiome alignment error for a microbial taxon of interest  $S$  between individual samples  $r$  and  $i$  as follows

$$E_M(r, i) = \sum_{j \in S} e^j(r, i).$$

137 Given a reference  $r$  and microbial taxon  $S$ , the alignment algorithm task  
138 is to find parameters  $a$  and  $b$  that minimize  $E_M$  for each individual sample  $i$   
139 in the data set subject to the constraints:  $a > 0$ ,  $\alpha < \beta$  and  $\frac{(\beta - \alpha)}{(t_{max} - t_{min})} \geq \epsilon$ .  
140 The latter constraint enforces that the overlap between aligned interval  $[\alpha, \beta]$   
141 and reference interval  $[t_{min}, t_{max}]$  is at least  $\epsilon$ , otherwise trivial solutions (for  
142 example, no overlap leading to 0 error) would be selected. Here we used  
143  $\epsilon = 0.3$  though results remain the same with larger values of  $\epsilon$ . Fig. 1c  
144 illustrates an aligned set of four samples where reference sample  $r$  is shown  
145 in orange. Alternatively, Additional file 2: Figure S1b shows the temporal  
146 alignment between the sub-samples of the vaginal microbiome sample shown  
147 in Figure S1a for taxa *L. crispatus* using the first menstrual period sub-  
148 sample as reference (shown in orange).

#### 149 *Selecting a reference sample*

150 Finding a reference that jointly minimizes  $E_M$  for all samples requires  
151 combinatorial analysis which takes time that is exponential in the number of  
152 individuals [13].

153 Instead, we used a heuristic approach to find the best pairwise alignment  
154 function and, ultimately, select an optimal reference. In particular, we first  
155 find the best pairwise alignments via a grid-search parameter sweep between  
156  $a \in (0, 4]$  with increments of 0.01 and  $b \in [-50, 50]$  with increments of 0.5  
157 in the linear alignment function  $f_i$  previously described. It is important to note  
158 that this restricted search space for parameters  $a$  and  $b$  may lead to some

159 sample pairs  $(r, i)$  without a temporal alignment because overlap constraint is  
160 not met. Additionally, we filtered out any microbial taxa  $j \in S$  for which the  
161 mean abundance in either  $s_r^j$  or  $s_i^j$  was less than 0.1%, or had zero variance  
162 over the originally sampled time points. Lastly, an optimal reference for  
163 each data set is determined by generating all possible pairwise alignments  
164 between samples. To select the best reference  $r^*$  we employed the following  
165 criteria: (1) at least 90% of the individual samples are aligned to  $r^*$ , and (2)  
166 the alignment error  $E_M$  is minimized.

167 **Abnormal or noisy samples filtering** As a post-processing step, we  
168 implemented a simple procedure which takes as input the resulting individual-  
169 wise alignments to identify and filter out abnormal and noisy samples. Given  
170 an aligned microbiome data set, we (1) computed the mean  $\mu$  and standard  
171 deviation  $\delta$  of the alignment error  $E_M$  across all aligned individual samples,  
172 and (2) removed all samples from an individual where  $E_M > \mu + (2 \times \delta)$ .  
173 Fig. 1d shows the filtered set for the aligned taxa in the previous step  
174 (Fig. 1c). This analysis can both, help to identify outliers and improves  
175 the ability to accurately reconstruct models for taxa interactions as we show  
176 in Results.

177 **Taxon selection from alignment** As previously described, the micro-  
178 biome alignment error  $E_M$  for a pairwise alignment is restricted to the set  
179 of microbial taxa  $S$  which contributed to the alignment. However, this set  
180 of microbes can vary for different pairwise alignments even with the same  
181 reference. Therefore, we focused on the subset of taxa which contributed to  
182 at least half of the pairwise alignments for the selected reference.

183 Additional file 4: Table S2 lists alignment information for each data set  
184 such as reference sample, number of aligned samples and selected taxa.

### 185 *Model construction*

186 Using the aligned taxa, we next attempted to learn graphical models  
187 that provide information about the causal impacts of taxa and clinical or  
188 demographic variables on other taxa. For this, we used Dynamic Bayesian  
189 Networks (DBNs) which have been widely used to model sequential data,  
190 including speech [16, 17], biological [18, 19, 10], or economic sequences [20,  
191 21]. A DBN is a directed acyclic graph where, at each *time slice* (or time  
192 instance), nodes correspond to random variables of interest (e.g., taxa, post-  
193 conceptional age, or Nugent score) and directed edges correspond to their  
194 conditional dependencies in the graph [22]. These time slices are not modeled  
195 separately. Instead a DBN contains edges connecting time slices known as

196 *inter edges* that are repeated for each time point modeled as depicted in  
197 Fig. 1e. In summary, the model learns the transition probability from one  
198 time point to the next as a stationary conditional probability. DBNs are  
199 considered generative models, therefore, ideal for modeling the compositional  
200 interactions and dynamics of the microbiota given the first time point.

201 Here, we use a “two-stage” DBN model in which only two slices are  
202 modeled and learned at a time. Throughout this paper, we will refer to the  
203 previous and current time slice with suffix  $ti$  and  $ti + 1$ , respectively. Fig. 1e  
204 illustrates a skeleton of the general structure of a two-stage DBN in the  
205 context of a longitudinal microbiome study. In this example, for each time  
206 slice, the nodes correspond to random variables of observed quantities for  
207 different microbial taxa ( $T_1, T_2, T_3, T_4$ ) or clinical factors ( $C_1, C_2, C_3$ ) shown  
208 as circles and diamonds, respectively. These variables can be connected by  
209 intra edges (dotted lines) or inter edges (solid lines). In this DBN model,  
210 the abundance of a particular microbe in the current time slice is determined  
211 by parameters from both intra and inter edges, thus, modeling the complex  
212 interactions and dynamics between the entities in the microbial community.

213 Typically, analysis using DBNs is divided into two components: learning  
214 the network structure and parameters and inference on the network. The  
215 former can be further sub-divided into (i) structure learning which involves  
216 inferring from data the causal connections between nodes (i.e., learning the  
217 intra and inter edges) while avoiding overfitting the model, and (ii) param-  
218 eter learning which involves learning the parameters of each intra and in-  
219 ter edge in a specific network structure. There are only a limited number  
220 of open software packages which support both learning and inference with  
221 DBNs [23, 24] in the presence of discrete and continuous variables. Here we  
222 used CGBayesNets package [23, 10] which is freely available software package  
223 for learning the network structure and performing inference for Conditional  
224 Gaussian Bayesian models [25]. While useful, CGBayesNets does not support  
225 several aspects of DBN learning including the use of intra edges, searching  
226 for a parent candidate set in the absence of prior information and more. We  
227 have thus extended the structure learning capabilities of CGBayesNets to  
228 include intra edges while learning network structures and implemented well-  
229 known network scoring functions for penalizing models based on the number  
230 of parameters such as Akaike Information Criterion (AIC) and Bayesian In-  
231 formation Criterion (BIC) [26].

**Learning DBN model parameters** Let  $\Theta$  denote the set of param-  
eters for the DBN and  $G$  denote a specific network structure over discrete



and continuous variables in the microbiome study. In a similar manner to McGeachie *et al.* [10], we can decompose the joint distribution as

$$P(\Delta)F(\Psi|\Delta) = \prod_{x \in \Delta} p(x | \mathbf{Pa}^G(x)) \prod_{y \in \Psi} f(y | \mathbf{Pa}^G(y))$$

where  $P$  denotes a set of conditional probability distributions over discrete variables  $\Delta$ ,  $F$  denotes a set of linear Gaussian conditional densities over continuous variables  $\Psi$ , and  $\mathbf{Pa}^G(X)$  denotes the set of parents for variable  $X$  in  $G$ . Since we are dealing with both, continuous and discrete nodes in the DBN, in our method, continuous variables (i.e., microbial taxa compositions) are modeled using a Gaussian with the mean set based on a regression model over the set of continuous parents as follows

$$f(y | u_1, \dots, u_k) \sim N(\lambda_0 + \sum_{i=1}^k \lambda_i \times u_i, \sigma^2)$$

where  $u_1, \dots, u_k$  are continuous parents of  $y$ ;  $\lambda_0$  is the intercept;  $\lambda_1, \dots, \lambda_k$  are the corresponding regression coefficients for  $u_1, \dots, u_k$ ; and  $\sigma^2$  is the standard deviation. We point out that if  $y$  has discrete parents then we need to compute coefficients  $L = \{\lambda_i\}_{i=0}^k$  and standard deviation  $\sigma^2$  for each discrete parents configuration. For example, the conditional linear Gaussian density function for variable  $T_{4\_ti+1}$  in Fig. 1e denoted as  $f(T_{4\_ti+1} | T_{4\_ti}, C_{3\_ti}, T_{2\_ti+1})$  is modeled by

$$N(\lambda_0 + \lambda_1 \times T_{4\_ti} + \lambda_2 \times C_{3\_ti} + \lambda_3 \times T_{2\_ti+1}, \sigma^2),$$

232 where  $\lambda_1, \lambda_2, \lambda_3$  and  $\sigma^2$  are the DBN model parameters. In general, given  
 233 a longitudinal data set  $D$  and known structure  $G$ , we can directly infer the  
 234 parameters  $\Theta$  by maximizing the likelihood of the data given our regression  
 235 model.

**Learning DBN structure** Learning the DBN structure can be expressed as finding the optimal structure and parameters

$$\max_{\Theta, G} P(D | \Theta, G)P(\Theta, G) = P(D, \Theta | G)P(G),$$

236 where  $P(D | \Theta, G)$  is the likelihood of the data given the model. Intuitively,  
 237 the likelihood increases as the number of valid parents  $\mathbf{Pa}^G(\cdot)$  increases,  
 238 thus, making it challenging to infer the most accurate model for data set

239 *D*. Therefore, the goal is to effectively search over possible structures while  
240 using a function that penalizes overly complicated structures and protects  
241 from overfitting.

Here, we maximize  $P(D, \Theta | G)$  for a given structure  $G$  using maximum likelihood estimation (MLE) coupled with BIC score instead of Bayesian Dirichlet equivalent sample-size uniform (BDeu) metric used in CGBayesNets [23]. The BDeu score requires prior knowledge (i.e., equivalent sample size priors) which are typically arbitrarily set to 1; however, multiple studies have shown the sensitivity of BDeu to these parameters [27, 28], as well as the use of improper prior distributions [29]. Alternatively, BIC score does not depend on the prior over the parameters, thus, an ideal approach for scenarios where prior information is not available or difficult to obtain. Next, in order to maximize the full log-likelihood term we implemented a greedy hill-climbing algorithm. We initialize the structure by first connecting each taxa node at the previous time point (for example  $T_{1\_ti}$  in Fig. 1e) to the corresponding taxa node at the next time point ( $T_{1\_ti+1}$  in Fig. 1e). We call this setting the *baseline* model since it ignores dependencies between taxa's and only tries to infer taxa levels based on its levels in the previous time points. Next, we added nodes as parents of a specific node via intra or inter edges depending on which valid edge (i.e., no cycles) leads to the largest increase of the log-likelihood function beyond the global penalty incurred by adding the parameters as measured by the BIC<sup>3</sup> score approximation

$$BIC(G, D) = \log P(D | \Theta, G) - \frac{d}{2} \log N,$$

242 where  $d = |\Theta|$  is the number of DBN model parameters in  $G$ , and  $N$  is the  
243 number of time points in  $D$ . Additionally, we imposed an upper bound limit  
244 on the maximum number of possible parents ( $maxParents \in \{1, 3, 5\}$ ) for  
245 each bacterial node  $X$  (i.e.,  $|\mathbf{Pa}^G(X)| \leq maxParents$ ).

#### 246 *Inferring biological relationships*

247 Microbial ecosystems are complex, often displaying a stunning diversity  
248 and a wide variety of relationships between community members. These bi-  
249 ological relationships can be broadly divided into two categories: *beneficial*:

---

<sup>3</sup>We also computed AIC score (i.e.,  $AIC(G, D) = \log P(D | \Theta, G) - d$ ) but it was consistently outperformed by BIC score.

250 (including mutualism, commensalism and obligate), or *harmful* (including  
251 competition, amensalism and parasitism). Although the longitudinal data  
252 sets considered in this study do not provide enough information to further  
253 sub-categorize each biological relationship (e.g., mutualism vs. commensal-  
254 ism), we use the learned DBN model from each microbiome data set and  
255 inspect each interaction as a means for inferring simple to increasingly com-  
256 plex relationships. For example, consider variable  $T_{4\_ti}$  in Fig. 1e. Given that  
257  $ti$  and  $ti + 1$  represent the previous time point and the current time point (re-  
258 spectively), the possible inference in this case is as follows: Edges from  $T_{4\_ti}$   
259 and  $C_{3\_ti}$  (inter edges), and from  $T_{2\_ti+1}$  (intra edge) suggest the existence  
260 of a temporal relationship in which the abundance of taxa  $T_4$  at a previous  
261 time instant and abundance of taxa  $T_2$  at the current time instant, as well  
262 as condition  $C_3$  from the previous time instant impact the abundance of  $T_4$   
263 at the current time. We previously stated that  $f(T_{4\_ti+1} | T_{4\_ti}, C_{3\_ti}, T_{2\_ti+1})$   
264 is modeled by  $N(\lambda_0 + \lambda_1 \times T_{4\_ti} + \lambda_2 \times C_{3\_ti} + \lambda_3 \times T_{2\_ti+1}, \sigma^2)$ . Therefore,  
265 inspecting the regression coefficients  $\lambda_1, \lambda_2, \lambda_3$  immediately suggests whether  
266 the impact is positive or negative. In this example, the regression coefficients  
267  $\lambda_1, \lambda_2$  are positive ( $\lambda_1, \lambda_2 > 0$ ) while coefficient  $\lambda_3$  is negative ( $\lambda_3 < 0$ ), thus,  
268 variables  $T_{4\_ti}$  and  $C_{3\_ti}$  exhibit positive relationships with microbial taxa  
269  $T_{4\_ti+1}$  shown as green edges in Fig. 1e, whereas taxa  $T_{2\_ti}$  exhibits a negative  
270 interaction with  $T_{4\_ti+1}$  shown as a red edge (Fig. 1e). This simple analytic  
271 approach enables us to annotate each biological relationship with directional  
272 information.

### 273 *Network visualization*

274 All the bootstrap networks<sup>4</sup> shown are visualized using *Cytoscape* [30]  
275 version 3.6.0, using Attribute Circle Layout with Organic Edge Router. An  
276 in-house script is used to generate a custom style XML file for each network,  
277 encoding the following information in the graph:

- 278 • Time  $ti$  nodes colored in orange
- 279 • Time  $ti + 1$  nodes colored in blue
- 280 • Number of incoming edges directly proportional to node size

---

<sup>4</sup>For each data set, we ran 500 bootstrap realizations and only reported edges with bootstrap support of at least 50% in the consensus DBN.

- 281 • Taxa abundance directly proportional to node transparency
- 282 • Clinical and demographic nodes represented with diamond shaped nodes
- 283 • Taxa nodes represented with circle shaped nodes
- 284 • Solid edges represent inter edges (i.e., from time slice  $t_i$  to  $t_i + 1$ )
- 285 • Dashed edges represent intra edges
- 286 • Positively weighted edges are colored in green
- 287 • Negatively weighted edges are colored in red
- 288 • Regression coefficient directly proportional to edge thickness
- 289 • Bootstrap value directly proportional to edge transparency

Also the regression coefficients corresponding to edge thickness were normalized as follows: Let  $y$  be a microbial taxa node with continuous taxa parents  $u_1, \dots, u_k$  modeled by

$$f(y | u_1, \dots, u_k) \sim N(\lambda_0 + \sum_{i=1}^k \lambda_i \times u_i, \sigma^2)$$

where  $\lambda_1, \dots, \lambda_k$  are the corresponding regression coefficients for  $u_1, \dots, u_k$  as previously described in this section. The normalized regression coefficients  $\{\lambda_i^N\}_{i=1}^k$  are defined as

$$\lambda_i^N = \frac{\lambda_i \times \bar{u}_i}{\sum_{j=1}^k |\lambda_j \times \bar{u}_j|},$$

290 where  $\bar{u}_i$  is the mean abundance of taxa  $u_i$  across all samples.

### 291 3. Results

292 Fig. 1 presents the computational pipeline we developed for aligning and  
293 learning DBNs for microbiome and clinical data. We start by estimating a  
294 cubic spline from the observed abundance profile of each taxa (Fig. 1b). Next,  
295 we determine an alignment which allows us to directly compare temporal data  
296 across individuals (Fig. 1c), as well as filter out abnormal and noisy samples  
297 (Fig. 1d). Finally, we use the aligned data to learn causal dynamic models

298 that provide information about interactions between taxa, their impact, and  
299 the impact of clinical variables on taxa levels over time (Fig. 1e-f).

300 We applied our methods to study longitudinal data sets from three human  
301 microbiome niches: infant gut, vagina and oral cavity (see Methods for full  
302 descriptions). In addition to the differences in the taxa they profile, these  
303 data sets vary in the number of subjects profiled (ranging from 18 to 58,  
304 in the number of time points they collected, the overall number of samples  
305 and time series that were studied, etc. Thus, they provide a good set to test  
306 the generality of our methods and their usefulness in different microbiome  
307 studies.

### 308 *Infant gut alignments captures gestational age at birth*

309 Below, we discuss in detail the improved accuracy of the learned dynamic  
310 models due to use of *temporal alignments*. However, even before using them  
311 for our models, we wanted to test whether the alignment results agree with  
312 biological knowledge. For this, we used the infant gut data. Infant gut mi-  
313 crobiota goes through a patterned shift in dominance between three bacterial  
314 populations (*Bacilli* to *Gammaproteobacteria* to *Clostridia*) in the weeks im-  
315 mediately following birth. La Rosa *et al.* [5] reported that the rate of change  
316 is dependent on maturation of the infant highlighting the importance of post-  
317 conceptional age as opposed to day of life when analyzing bacterial compo-  
318 sition dynamics in preterm infants. We found that our alignment method  
319 is able to capture this rate of change without explicitly using gestational or  
320 post-conceptional age.

321 Fig. 2 shows the relationship between alignment parameters  $a$  and  $b$  (from  
322 the transformation function  $f_i(t) = \frac{(t-b)}{a}$  described in Methods) and the ges-  
323 tational age at birth for each infant in the gut microbiome data set. Each  
324 aligned infant sample is represented by a blue circle where the x-axis shows  
325  $\frac{-b}{a}$  and y-axis shows the gestational age at birth. As can be seen, the align-  
326 ment parameters are reasonably well correlated with gestational age at birth  
327 (Pearson's correlation coefficient = 0.35) indicating that this method can  
328 indeed be used to infer differences in rates between individuals.

### 329 *Resulting dynamic Bayesian network models*

330 We next applied the full pipeline to learn DBNs from the three micro-  
331 biome data sets under study. In particular, we use longitudinal data sets  
332 from three human microbiome niches: infant gut, vaginal and oral cavity as  
333 described in Methods. In this section, we highlight the overall characteristics

334 of the learned DBN for each aligned and filtered microbiome data set (Fig-  
335 ure 3 and Additional file 5: Figure S3). In these figures the nodes represent  
336 taxa and clinical (or demographic) variables and the directed edges represent  
337 temporal relationships between them. Several triangles were also observed in  
338 the networks. In some of the triangles, directed edges to a given node were  
339 linked from both time slices of another variable. We will refer to these as  
340 *directed triangles*.

341 **Infant gut** The learned DBN model for the infant gut microbiota data set  
342 at a sampling rate of 3 days and  $maxParents = 3$  was computed. It contains  
343 19 nodes per time slice (14 microbial taxa, 4 clinical and 1 demographic  
344 variable nodes) and 39 directed edges (31 inter edges and 8 intra edges) with  
345 no directed triangles as shown in Fig. 3a. Since we only learn temporal  
346 conditional dependence (i.e., incoming edges) for taxa nodes at time slice  
347  $i + 1$ , the maximum number of possible edges is  $14 \times maxParents = 42$ , thus,  
348 most of the taxa nodes (11 out of 14) have reached the maximum number of  
349 parents allowed (i.e.,  $maxParents = 3$ ). Additionally, the majority of these  
350 temporal relationships are between microbial taxa. In particular, the model  
351 includes several interactions between the key colonizers of the premature  
352 infant gut: *Bacilli*, *Clostridia* and *Gammaproteobacteria*. Furthermore, the  
353 only negative interactions learned by the model comprise these microbes  
354 which are directly involved in the progression of the infant gut microbiota.  
355 Also, the nodes for gestational age at birth and post-conceptual age at  
356 birth are not shown because they are isolated from the rest of the network,  
357 without any single edge. Overall, these trends strongly suggest that the DBN  
358 is capturing biologically relevant interactions between taxa.

359 **Vaginal** As with the gut microbiome data set, we learned a DBN model  
360 for the vaginal microbiome data at a sampling rate of 3 days and  $maxParents =$   
361 3 (Fig. 3b). The resulting DBN is comprised of 24 nodes per time instance  
362 (23 taxa and 1 clinical) and 58 edges (40 inter edges and 18 intra edges). Ad-  
363 ditionally, 12 directed triangles involving taxa nodes were observed. In pre-  
364 liminary analyses, additional clinical and demographic attributes (e.g., Nu-  
365 gent category, race and age group) resulted in networks with these variables  
366 connected to all taxa nodes, thus, removed from further analysis. Specif-  
367 ically, we estimated the degree of overfitting of these variables by learn-  
368 ing and testing DBN models with and without them. This resulted in the  
369 DBN shown in Fig. 3b which exhibited lowest generalization error. In this  
370 case, the maximum number of potential edges between bacterial nodes is  
371  $24 \times maxParents = 72$ ; however, only 16 out of 24 taxa nodes reached the

372 threshold on the maximum number of parents. Among all the 58 edges, only  
373 one interaction *Day\_Period<sub>ti+1</sub>* to *L. iners<sub>ti+1</sub>* involves a clinical node  
374 whereas the remaining 57 edges (including 15 negative interactions) cap-  
375 tured temporal relationships among microbial taxa. This mixture of positive  
376 and negative interactions between taxa provides evidence of the DBNs ability  
377 to capture the complex relationships and temporal dynamics of the vaginal  
378 microbiota.

379 **Oral cavity** We learned a DBN with the longitudinal tooth/gum mi-  
380 crobiome data set with a sampling rate of 7 days and  $maxParents = 3$ .  
381 Additional file 5: Figure S3 shows the learned DBN which contains 20 nodes  
382 for each time slice (19 taxa and 1 clinical) and 52 edges (33 inter edges and  
383 19 intra edges) out of 57 possible edges. In addition 2 directed triangles  
384 were observed involving taxa nodes. Here, the DBN model includes multiple  
385 positive and negative interactions among early colonizers (e.g., *Veillonella*  
386 and *H. parainfluenzae*) and late colonizers (e.g., *Porphyromonas*) of the oral  
387 microbiota which are supported by previous experimental studies [31].

#### 388 *Comparisons to prior methods*

389 To evaluate the accuracy of our pipeline and to compare them to models  
390 reconstructed by prior methods published in the literature [32, 10], we used  
391 a per-subject cross-validation with the goal of predicting microbial taxon  
392 abundances using the learned models. In each iteration, the longitudinal mi-  
393 crobial abundance profile of a single subject was selected as the test set, and  
394 the remaining profiles were used for building the network and learning model  
395 parameters. Next, starting from the second time point, we used the learned  
396 model to predict an abundance value for every taxa in the test set at each  
397 time point using the previous and current time points. Predicted values were  
398 normalized to represent relative abundance of each taxa across the microbial  
399 community of interest. Finally, we measured the average predictive accuracy  
400 by computing the mean absolute error (MAE) for the selected taxon in the  
401 network. We repeated this process (learning the models and predicting based  
402 on them) for several different sampling rates, which ranged from 1 up to 28  
403 days depending on the data set. The original and predicted microbial abun-  
404 dance profiles can be compared as shown in Fig. 1f. The average MAE for  
405 predictions on the three data sets are summarized in Fig. 4(a-c). For each  
406 data set, error plots are shown for ten different methods. Along with two of  
407 our DBNs (one with and one without alignments), four methods with and  
408 four without alignments were compared. These are further described below.

409 First, we compared the DBN strategy to a naive (baseline) approach. This  
410 baseline approach makes the trivial prediction that the abundance value for  
411 each taxa  $A$  at any given point is exactly equal to the abundance measured  
412 at the previous time point. Given that measured abundances are continuous  
413 variables, this turns out to be an extremely competitive method and per-  
414 forms better than most prior methods for the data sets we tested on. Next,  
415 we compared our DBNs to three other methods suggested for modeling in-  
416 teractions among taxa: (a) McGeachie *et al.* [10] developed a different DBN  
417 model where network learning is estimated from the BDeu scoring metric [23]  
418 (instead of MLE), (b) McGeachie *et al.*++ an in-house implementation that  
419 extends McGeachie *et al.*'s method to allow for intra edges during structure  
420 learning, and (c) MTPLasso [32] that models time-series microbial data us-  
421 ing a gLV model. In all cases, we used the default parameters as provided in  
422 the original publications.

423 As can be seen, our method outperforms the baseline and previous meth-  
424 ods for the infant gut data. It also performs favorably when compared to  
425 baseline on the other two data sets. Temporal alignments improved the  
426 predictive performance over unaligned samples across gut and vaginal mi-  
427 crobiomes by about 1-4 percentage points. In particular, a two-tailed t-  
428 test indicates significant (denoted by \*) performance improvements for most  
429 sampling rates (*infant gut*:  $p$ -value = 0.043\* for 1d,  $p$ -value = 0.034\*  
430 for 3d,  $p$ -value = 0.109 for 5d, and  $p$ -value <  $1.00E - 05$ \* for 7d;  
431 *vaginal*:  $p$ -value <  $1.00E - 06$ \* for 1d,  $p$ -value <  $1.00E - 05$ \* for  
432 3d,  $p$ -value =  $5.50E - 05$ \* for 5d,  $p$ -value =  $3.10E - 03$ \* for 7d, and  
433  $p$ -value = 0.097 for 14d). On the other hand, alignments did not show  
434 significant predictive performance improvements on the oral data set and is  
435 consistent with previous analysis on the same data set [12]. Surprisingly,  
436 the simple baseline approach outperforms all previously published methods:  
437 McGeachie *et al.* [10] and MTPLasso [32] across the three data sets. Finally,  
438 Fig. 4d highlights the MAE results for a sampling rate that most closely  
439 resembles the originally measured time points.

#### 440 *Anomaly detection using alignment*

441 When analyzing large cohorts of microbiome data, it is important to  
442 implement a strategy to remove outliers as these can affect our ability to  
443 generalize from the collected data. As discussed in Methods, we can use our  
444 alignment error  $E_M$  score to identify such subjects and remove them prior to  
445 modeling. In the context of the gut data set, this resulted in the identification



446 of two infant samples: Subjects 5 and 55 (highlighted in red within Additional  
447 file 6: Figure S4a) which are likely processing errors, contaminated samples,  
448 or just natural anomalies. Sample 55 has been previously identified as a  
449 likely abruption event by McGeachie *et al.* [10] using a different approach.  
450 Similarly, Additional file 6: Figure S4b shows the distribution of alignment  
451 errors  $E_M$  for the vaginal microbiome data. In this case, we remove 6 sub-  
452 samples from 4 different women (highlighted in red). We note that there were  
453 no outliers identified in the oral cavity microbiome data set. When learning  
454 DBNs following the filtering we obtain even better models. Additional file 7:  
455 Figure S5 compares the average MAE results of our proposed DBN model  
456 between the unfiltered and filtered samples for the gut and vaginal data sets.  
457 As can be seen, a large performance improvement is observed for the gut data  
458 while a slight improvement is observed for the vaginal data when removing  
459 the outliers. These results suggest that even though the method uses less  
460 data to learn the models, the models that it does learn are more accurate.

#### 461 4. Discussion

##### 462 *The power of temporal alignments*

463 We developed a pipeline for the analysis of longitudinal microbiome data  
464 and applied it to three data sets profiling different human body parts. To  
465 evaluate the reconstructed networks we used them to predict changes in taxa  
466 abundance over time. Interestingly, ours is the first method to improve upon  
467 a naive baseline (Fig. 4). While this does not fully validate the accuracy of  
468 the models, it does mean that the additional interactions determined by our  
469 method contribute to the ability to infer future changes and so at least some  
470 are likely true.

471 As part of our pipeline we perform temporal alignment. While ground  
472 truth for alignments is usually hard to determine, in one of the data sets we  
473 analyzed we could compare the alignment results to external information to  
474 test its usefulness. In the context of the infant gut data, it has been shown  
475 that using day of life as the independent variable hinders the identification of  
476 associations between bacterial composition and day of sampling. Therefore,  
477 previous work have re-analyzed the premature gut microbiota with post-  
478 conceptional age, uncovering biologically relevant relationships [5]. By using  
479 alignment we were able to correct for this difference without the need to  
480 rely on the external age information. In addition to the results presented in

481 Fig. 2, the learned DBN in Fig. 3a does not show any relationships to post-  
482 conceptional age or gestational age at birth indicating that our alignment  
483 was able to successfully compensate for. While for this data such correction  
484 could have been made using post-conceptional age, in other cases the reason  
485 for the rate change may not be obvious and without alignment it would be  
486 hard to account for such hidden effects.

#### 487 *Uncovering biological relationships*

488 We next discuss in more detail the learned DBN models.

489 **Infant gut** As mentioned in Results, the only negative relationships iden-  
490 tified supports the known colonization order, that is, a shift in dominance  
491 from *Bacilli* to *Gammaproteobacteria* to *Clostridia*) [5], as the infant goes  
492 through the first several weeks of life. These edges show incoming negative  
493 relationships to *Bacilli* from *Gammaproteobacteria* and *Clostridia*. In partic-  
494 ular, an increase in the abundance of the parents is associated with a decrease  
495 in the abundance of the child. The negative edge from *Gammaproteobacte-*  
496 *ria* to *Clostridia* agrees with previous findings where *Clostridia*'s abundance  
497 is found to increase at a gradual rate until it peaks at post-conceptional  
498 age between 33 and 36 weeks whereas *Gammaproteobacteria* decreases as  
499 infants age [5, 10]. This relationship is also confirmed by the edges from  
500 *Day of life* to *Gammaproteobacteria* and *Clostridia* (Fig. 3b). Moreover, the  
501 DBN model indicates a relationship between breastfeeding and *Actinobacte-*  
502 *ria*, *Bacteroidia*, and *Alphaproteobacteria*. These bacteria are known to be  
503 present in breast milk which is known to heavily influence and shape the  
504 infant gut microbiome [33].

505 **Vaginal** It has been established that microbial composition can change  
506 dramatically during the menses cycle and later return to a 'stable' state be-  
507 fore the next menstrual period [34, 35]. Previous studies have identified a  
508 subset of individuals in this data set as exhibiting a microbial composition  
509 dominated by *L. crispatus* with a notable increase of *L. iners* around the  
510 start of each menstrual period [4, 34] (Additional file 2: Figure S1a). These  
511 interactions were also captured by the learned DBN model in the form of a  
512 directed triangle involving *L. crispatus* and *L. iners* (Fig. 3b). On the other  
513 hand, subjects from another group were characterized as dominated by *L.*  
514 *gasseri* coupled with shifts to *Streptococcus* during menstruation [4]. These  
515 relationships were also captured by the DBN. The edge from the *Day Period*  
516 to *L. iners* strengthens this relationship. Furthermore, while *L. iners* has  
517 a lower protective value than the other *Lactobacillus* [36], the negative edge

518 between *L. iners* and *Atopobium* suggests a relationship related to environ-  
519 ment protection. Also, the positive edge from *Atopobium* to *Gardnerella*  
520 is supported by the synergy observed between these two taxa in bacterial vagi-  
521 nosis [37]. Finally, it is important to note that the shifts and composition of  
522 the vaginal microbiome vary considerably between each subject.

523 **Oral** For oral microbiomes, several *Streptococcus* species, including *S.*  
524 *oralis*, *S. mitis*, *S. gordonii*, and *S. sanguis* are well known as early colo-  
525 nizers lying close to the tooth pellicle [31]. While our DBN cannot identify  
526 specific species, it suggests interactions between some species of *Streptococ-*  
527 *cus* and other later colonizers in the oral microbiome such as *Porphyromonas*  
528 and *Prevotella*. The DBN also provided novel predictions, for example taxa  
529 *Granulicatella* is interacting with *Veilonella*.

### 530 *Triangles in DBNs*

531 An interesting aspect shared by all of the DBNs discussed above is the  
532 fact that they contain triangles or feed-forward loops. In particular many of  
533 these directed triangles are created from nodes representing both time slices  
534 of another variable, but with different signs (one positive and the other neg-  
535 ative). For example, microbial taxa *L. crispatus* displays a directed triangle  
536 with another taxa *L. iners* in the vaginal DBN (Fig. 3b). In this triangle, pos-  
537 itive edges from *L. iners<sub>ti</sub>* interact with *L. iners<sub>ti+1</sub>* and *L. crispatus<sub>ti+1</sub>*  
538 whereas a negative edge connects *L. iners<sub>ti+1</sub>* to *L. crispatus<sub>ti+1</sub>*.

539 The triangles in the DBNs represent a relationship where the abundance  
540 of a child node cannot be solely determined from the abundance of a parent at  
541 one time slice. Instead, information from both the previous and the current  
542 time slices is needed. This can be interpreted as implying that the child node  
543 is associated with the *change* of the abundance values of the parents rather  
544 than with the absolute values which each node represents.

### 545 *Limitation and future work*

546 While our pipeline of alignment followed by DBN learning successfully  
547 reconstructed models for the data sets we looked at, it is important to under-  
548 stand the limitation of the approach. First, given the complexity of aligning  
549 a large number of individuals, our alignment method is based on a greedy  
550 algorithm, thus, it is not guaranteed to obtain the optimal result. Even if  
551 the alignment procedure is successful, the DBN may not be able to reflect  
552 the correct interactions between taxa. Issues related to sampling rates can

553 impact the accuracy of the DBN (missing important intermediate interac-  
554 tions) while on the other hand if not enough data is available the model can  
555 overfit and predict non-existent interactions.

556 Given these limitations we would attempt to improve the alignment method  
557 and its guarantees in future work. We are also interested in studying the  
558 ability of our procedure to integrate additional molecular longitudinal infor-  
559 mation including gene expression and metabolomics data which some studies  
560 are now collecting in addition to the taxa abundance data [38]. We believe  
561 that our approach for integrating information across individual in order to  
562 learn dynamic models would be useful for several ongoing and future studies.

## 563 **5. Conclusions**

564 In this paper, we propose a novel approach to the analysis of longitudi-  
565 nal microbiome data sets using dynamic Bayesian networks with the goal of  
566 eliciting temporal relationships between various taxonomic entities and other  
567 clinical factors describing the microbiome. The novelty of our approach lies in  
568 the use of temporal alignments to normalize the differences in pace of biolog-  
569 ical processes inherent within different subjects. Additionally, the alignment  
570 algorithm can be used to filter out abrupt events or noisy samples. Our re-  
571 sults show that microbiome alignments improve predictive performance over  
572 previous methods and enhance our ability to infer known and potentially  
573 novel biological and environmental relationships between the various entities  
574 of a microbiome and the other clinical and demographic factors that describe  
575 the microbiome.

## 576 **References**

- 577 [1] I. Cho, M. J. Blaser, The human microbiome: at the interface of health  
578 and disease, *Nat Rev Genet* 13 (2012) 260–270.
- 579 [2] D. Anderson, HABs in a changing world: a perspective on harmful algal  
580 blooms, their impacts, and research and management in a dynamic era  
581 of climactic and environmental change, *Harmful Algae* 10 (2012) 3–17.
- 582 [3] G. K. Gerber, The dynamic microbiome, *FEBS Lett* 588 (2014) 4131–  
583 4139.

- 584 [4] P. Gajer, R. M. Brotman, G. Bai, J. Sakamoto, U. M. E. Schütte,  
585 X. Zhong, S. S. K. Koenig, L. Fu, Z. S. Ma, X. Zhou, Z. Abdo, L. J.  
586 Forney, J. Ravel, Temporal dynamics of the human vaginal microbiota,  
587 *Sci Transl Med* 4 (2012) 132ra52.
- 588 [5] P. S. La Rosa, B. B. Warner, Y. Zhou, G. M. Weinstock, E. Sodergren,  
589 C. M. Hall-Moore, H. J. Stevens, W. E. Bennett, N. Shaikh, L. A.  
590 Linneman, J. A. Hoffmann, A. Hamvas, E. Deych, B. A. Shands, W. D.  
591 Shannon, P. I. Tarr, Patterned progression of bacterial populations in  
592 the premature infant gut, *Proc Natl Acad Sci* 111 (2014) 12522–12527.
- 593 [6] M. Chung, J. Krueger, M. Pop, Identification of microbiota dynamics  
594 using robust parameter estimation methods, *Math Biosci* 294 (2017)  
595 71–84.
- 596 [7] S. Marino, N. T. Baxter, G. B. Huffnagle, J. F. Petrosino, P. D. Schloss,  
597 Mathematical modeling of primary succession of murine intestinal mi-  
598 crobiota, *Proc Natl Acad Sci* 111 (2014) 439–444.
- 599 [8] R. R. Stein, V. Bucci, N. C. Toussaint, C. G. Buffie, G. Räscht, E. G.  
600 Pamer, C. Sander, J. B. Xavier, Ecological modeling from time-series  
601 inference: Insight into dynamics and stability of intestinal microbiota,  
602 *PLoS Comput Biol* 9 (2013) 1–11.
- 603 [9] P. Trosvik, N. C. Stenseth, K. Rudi, Characterizing mixed microbial  
604 population dynamics using time-series analysis, *ISME J* 2 (2008) 707–  
605 715.
- 606 [10] M. J. McGeachie, J. E. Sordillo, T. Gibson, G. M. Weinstock, Y.-Y.  
607 Liu, D. R. Gold, S. T. Weiss, A. Litonjua, Longitudinal prediction of  
608 the infant gut microbiome with dynamic bayesian networks, *Sci Rep*  
609 (2016) 20359.
- 610 [11] R. P. Nugent, M. A. Krohn, S. L. Hillier, Reliability of diagnosing  
611 bacterial vaginosis is improved by a standardized method of gram stain  
612 interpretation., *J Clin Microbiol* 29 (1991) 297–301.
- 613 [12] D. B. DiGiulio, B. J. Callahan, P. J. McMurdie, E. K. Costello, D. J.  
614 Lyell, A. Robaczewska, C. L. Sun, D. S. A. Goltsman, R. J. Wong,  
615 G. Shaw, D. K. Stevenson, S. P. Holmes, D. A. Relman, Temporal and

- 616 spatial variation of the human microbiota during pregnancy, *Proc Natl*  
617 *Acad Sci* 112 (2015) 11060–11065.
- 618 [13] Z. Bar-Joseph, G. K. Gerber, D. K. Gifford, T. Jaakkola, I. Simon, Con-  
619 tinuous representations of time-series gene expression data, *J Comput*  
620 *Biol* 10 (2003) 341–356.
- 621 [14] A. A. Smith, A. Vollrath, C. A. Bradfield, M. Craven, Clustered align-  
622 ments of gene-expression time series data, *Bioinformatics* 25 (2009)  
623 i119–i127.
- 624 [15] Z. Bar-Joseph, A. Gitter, I. Simon, Studying and modelling dynamic  
625 biological processes using time-series gene expression data, *Nat Rev*  
626 *Genet* 13 (2012) 552–564.
- 627 [16] A. V. Nefian, L. Liang, X. Pi, X. Liu, K. Murphy, Dynamic bayesian  
628 networks for audio-visual speech recognition, *EURASIP J Adv Signal*  
629 *Process* (2002) 1274–1288.
- 630 [17] G. Zweig, Speech recognition with Dynamic Bayesian Networks, Ph.D.  
631 thesis, University of California, Berkeley, 1998.
- 632 [18] M. A. de Luis Balaguer, A. P. Fisher, N. M. Clark, M. G. Fernandez-  
633 Espinosa, B. K. Möller, D. Weijers, J. U. Lohmann, C. Williams,  
634 O. Lorenzo, R. Sozzani, Predicting gene regulatory networks by combin-  
635 ing spatial and temporal gene expression data in arabidopsis root stem  
636 cells, *Proc Natl Acad Sci* 114 (2017) E7632–E7640.
- 637 [19] J. T. Halloran, J. A. Bilmes, W. S. Noble, Dynamic bayesian network for  
638 accurate detection of peptides from tandem mass spectra, *J Proteome*  
639 *Res* 15 (2016) 2749–2759.
- 640 [20] J. W. Robinson, A. J. Hartemink, Learning non-stationary dynamic  
641 bayesian networks, *J Mach Learn Res* 11 (2010) 3647–3680.
- 642 [21] P. Weber, G. Medina-Oliva, C. Simon, B. Iung, Overview on bayesian  
643 networks applications for dependability, risk analysis and maintenance  
644 areas, *Eng Appl Artif Intell* 25 (2012) 671–682.
- 645 [22] S. J. Russell, P. Norvig, *Artificial Intelligence: A Modern Approach*,  
646 Prentice Hall Press, Upper Saddle River, NJ, USA, 2nd edition, 2003.

- 647 [23] M. J. McGeachie, H.-H. Chang, S. T. Weiss, CGBayesNets: Conditional  
648 gaussian bayesian network learning and inference with mixed discrete  
649 and continuous data, *PLoS Comput Biol* 10 (2014) 1–7.
- 650 [24] B. Wilczyński, N. Dojer, BNFinder: exact and efficient method for  
651 learning bayesian networks, *Bioinformatics* 25 (2009) 286–287.
- 652 [25] S. L. Lauritzen, N. Wermuth, Graphical models for associations between  
653 variables, some of which are qualitative and some quantitative, *Ann  
654 Statist* 17 (1989) 31–57.
- 655 [26] W. D. Penny, Comparing dynamic causal models using AIC, BIC and  
656 free energy, *NeuroImage* 59 (2012) 319–330.
- 657 [27] T. Silander, P. Kontkanen, P. Myllymäki, On sensitivity of the map  
658 bayesian network structure to the equivalent sample size parameter, in:  
659 *Proc. 23rd Conference on Uncertainty in Artificial Intelligence, UAI '07*,  
660 pp. 360–367.
- 661 [28] H. Steck, Learning the bayesian network structure: Dirichlet prior vs  
662 data, in: *Proc. 24th Conference on Uncertainty in Artificial Intelligence,  
663 UAI '08*, pp. 511–518.
- 664 [29] A. O'Hagan, J. J. Forster, Kendall's advanced theory of statistics, Vol.  
665 2B: Bayesian inference, Edward Arnold Press, London, UK, 2nd edition,  
666 2004.
- 667 [30] P. Shannon, A. Markiel, O. Ozier, N. S. Baliga, J. T. Wang, D. Ramage,  
668 N. Amin, B. Schwikowski, T. Ideker, Cytoscape: a software environment  
669 for integrated models of biomolecular interaction networks, *Genome Res*  
670 13 (2003) 2498–2504.
- 671 [31] P. E. Kolenbrander, R. N. Andersen, D. S. Blehert, P. G. Eglund, J. S.  
672 Foster, R. J. Palmer, Communication among oral bacteria, *Microbiol  
673 Mol Biol Rev* 66 (2002) 486–505.
- 674 [32] C. Lo, R. Marculescu, Inferring microbial interactions from metage-  
675 nomic time-series using prior biological knowledge, in: *Proc. 8th ACM  
676 Conference on Bioinformatics, Computational Biology, and Health In-  
677 formatics, ACM-BCB '17*, pp. 168–177.

- 678 [33] T. Jost, C. Lacroix, C. Braegger, C. Chassard, Assessment of bac-  
679 terial diversity in breast milk using culture-dependent and culture-  
680 independent approaches, *Br J Nutr* 110 (2013) 1253–1262.
- 681 [34] R. J. Hickey, Z. Abdo, X. Zhou, K. Nemeth, M. Hansmann, T. W.  
682 Osborn, F. Wang, L. J. Forney, Effects of tampons and menses on the  
683 composition and diversity of vaginal microbial communities over time,  
684 *BJOG* 120 (2013) 695–706.
- 685 [35] J. Ravel, P. Gajer, Z. Abdo, G. M. Schneider, S. S. K. Koenig, S. L.  
686 McCulle, S. Karlebach, R. Gorle, J. Russell, C. O. Tacket, et al., Vaginal  
687 microbiome of reproductive-age women, *Proc Natl Acad Sci* 108 (2011)  
688 4680–4687.
- 689 [36] M. I. Petrova, G. Reid, M. Vaneechoutte, S. Lebeer, *Lactobacillus iners*:  
690 friend or foe?, *Trends Microbiol* 25 (2017) 182–191.
- 691 [37] L. Hardy, V. Jespers, S. Abdellati, I. De Baetselier, L. Mwambarangwe,  
692 V. Musengamana, J. van de Wijgert, M. Vaneechoutte, T. Crucitti,  
693 A fruitful alliance: the synergy between atopobium vaginae and gard-  
694 nerella vaginalis in bacterial vaginosis-associated biofilm, *Sex Transm*  
695 *Infect* 92 (2016) 487–491.
- 696 [38] T. I. H. (iHMP) Research Network Consortium, The integrative human  
697 microbiome project: Dynamic analysis of microbiome-host omics profiles  
698 during periods of human health and disease, *Cell Host & Microbe* 16  
699 (2014) 276–289.



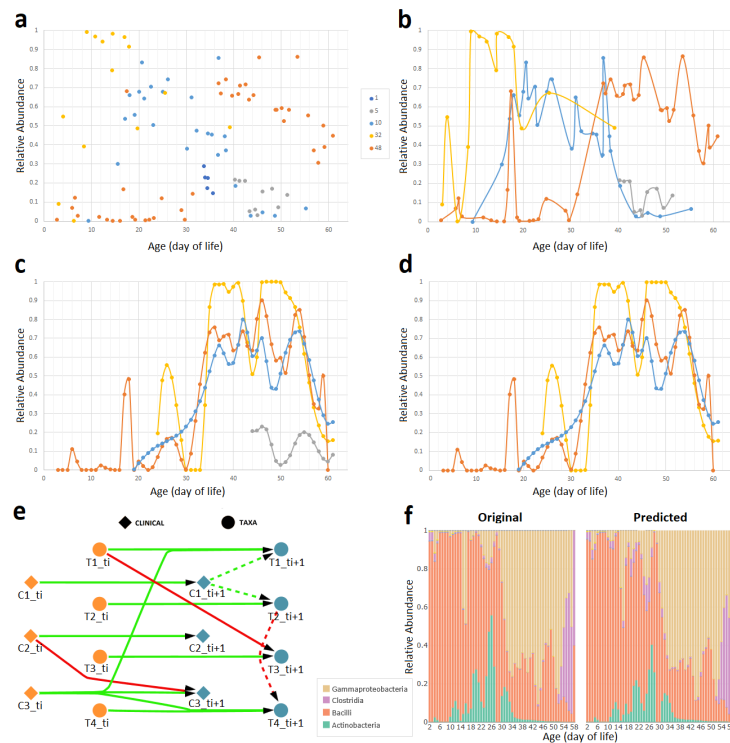

Figure 1: **Computational pipeline proposed in this work.** Figure shows microbial taxa *Gammaproteobacteria* at each step in the pipeline from a set of five representative individual samples (subjects 1, 5, 10, 32 and 48) of the infant gut data set at a sampling rate of 1 day. **a** — Raw relative abundance values for each sample measured at (potentially) non-uniform intervals even within the same subject. **b** — Cubic B-spline curve for each individual sample. Sample corresponding to subject 1 (dark blue) contains less than pre-defined threshold for measured time points, thus, removed from further analysis. The remaining smoothed curves enable principled estimation of unobserved time points and interpolation at uniform intervals. **c** — Temporal alignment of each individual sample against a selected reference sample (subject 48 shown in orange). **d** — Post-alignment filtering of samples with alignment error higher than a pre-defined threshold. Sample corresponding to subject 5 (grey) discarded. **e** — Learning a dynamic Bayesian network (DBN) structure and parameters. Let nodes  $(T_1, T_2, T_3, T_4)$  represent microbial taxa and  $(C_1, C_2, C_3)$  represent clinical factors shown as circles and diamonds, respectively. Figure shows two consecutive time slices  $t_i$  and  $t_i + 1$ , where dotted lines connect nodes from the same time slice referred to as *intra edges*, and solid lines connect nodes between time slices referred to as *inter edges*. Biological relationships are inferred from edge parameters in the learned DBN which can be positive (green) or negative (red). **f** — Original and predicted relative abundance across four infant gut taxa for subject 48 at sampling rate of 1 day. Performance is evaluated by average mean absolute error (MAE) between original and predicted abundance values (MAE = 0.011).

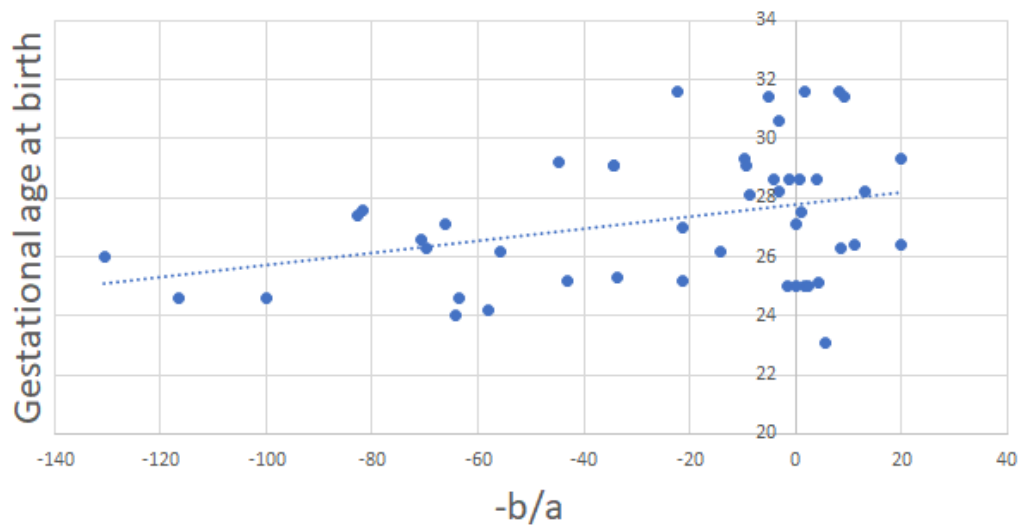

Figure 2: **Relationship between alignment parameters and gestational age at birth.** Figure shows the relationship between alignment parameters  $a$  and  $b$  and gestational age at birth for the aligned infant gut microbiome data set. Each blue dot represent an aligned infant sample  $i$  where x-axis shows  $\frac{-b}{a}$  from transformation function  $f_i(t) = \frac{(t-b)}{a}$  and y-axis shows the gestational age at birth of infant  $i$ . Pearson correlation coefficient = 0.35.

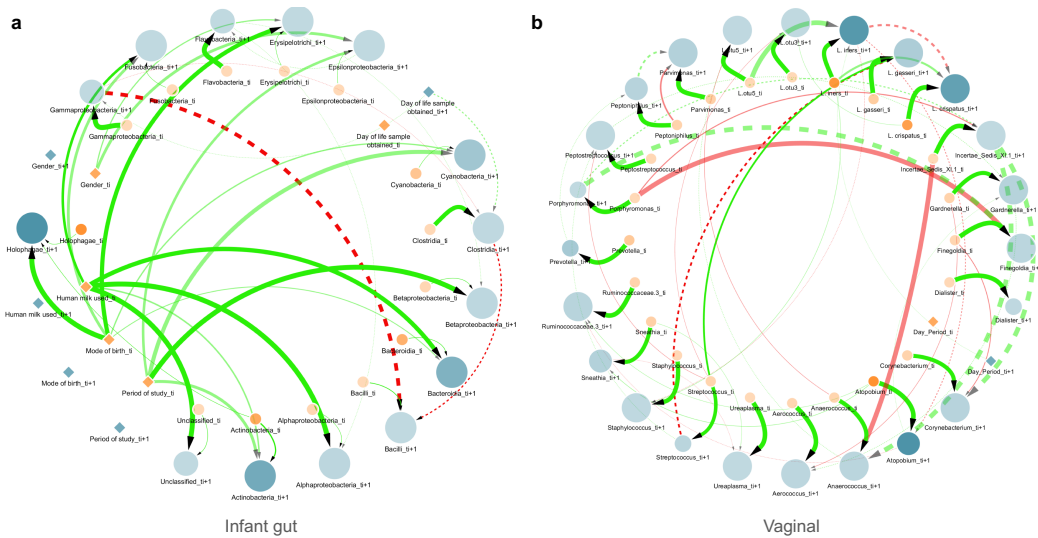

**Figure 3: Dynamic Bayesian network for two representative data sets.** Figure shows two consecutive time slices  $t_i$  (orange) and  $t_i + 1$  (blue), where nodes are either microbial taxa (circles) or clinical factors (diamonds). Nodes size is proportional to in-degree whereas taxa nodes transparency indicates mean abundance. Additionally, dotted lines denote *intra edges* (i.e., directed links between nodes in same time slice) whereas solid lines denote *inter edges* (i.e., directed links between nodes in different time slices). Edge color indicates positive (green) or negative (red) temporal influence and edge transparency indicates strength of bootstrap support. Edge thickness indicates statistical influence of regression coefficient as described in Network visualization. **a** — Learned DBN for the aligned infant gut microbiome data at a sampling rate of 3 days and  $maxParents = 3$ . **b** — Learned DBN for the aligned vaginal microbiome data at a sampling rate of 3 days and  $maxParents = 3$ .

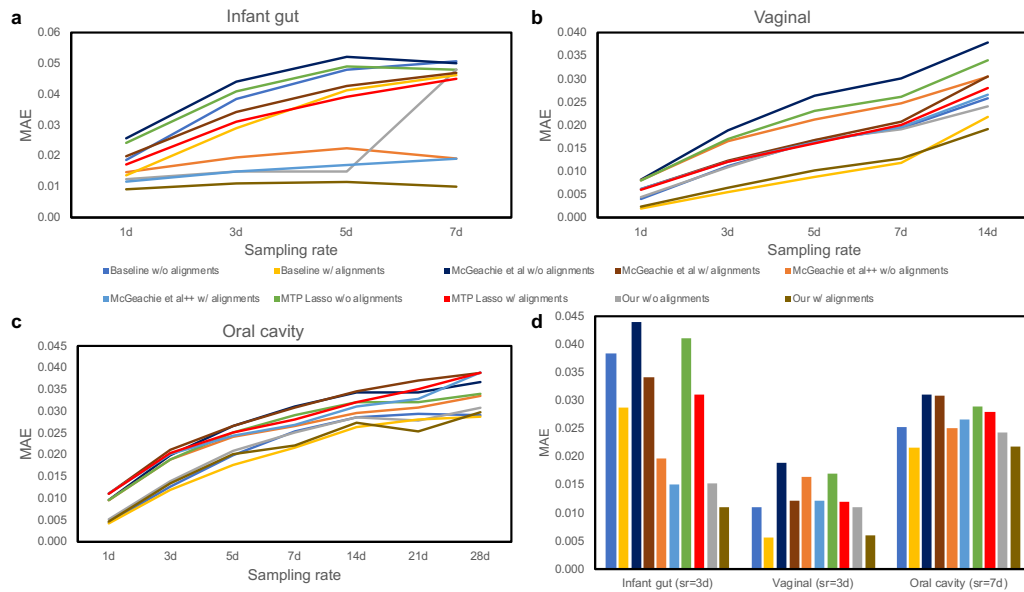

**Figure 4: Comparison of average predictive accuracy between methods on the filtered data sets.** Figure shows the average MAE of our proposed DBN models against a baseline method and previously published approaches as a function of sampling rates where  $d$  denotes day(s). Additionally, each method is run on the unaligned and aligned data sets. **a** — Performance results for infant gut microbiome data. **b** — Performance results for vaginal microbiome data. **c** — Performance results for oral cavity microbiome data. **d** — Performance results for each data set for a sampling rate ( $sr$ ) that most closely resembles the originally measured time points.
